# Supplementary material for: Determinants that Associated with Traveling History of COVID-19 Patients in Ethiopia During Stay at Home State of Emergency
Source: Research Square preprint supplement (doi:10.21203/rs.3.rs-754248/v1), 2021-08-02
Supplement: Supplementary file 1 [file ea909b4d06780f136056721f.docx]

**Appendix**

*STATA 14-codes for data Analysis*

*Descriptive statistics code*

*tab1 travelhi*

*tab SEX travelhi,cell*

*tab Agecat1 travelhi,cell*

*tabulate SEX travelhi, chi2 ==*🡺 *chi-square test*

*tabulate Agecat1 travelhi, chi2*

*graph pie, over(Agecat1) angle(100) plabel(1 percent, color(yellow)) plabel(2 percent, color(gold)) plabel(3 percent, color(blue)) plabel(4 percent, color(black)) legend(on position(3))*

*graph bar (count), over(Agecat1, label(labcolor(gold))) over(travelhi) bar(1, fcolor(green)) bar(2, fcolor(green)) bar(3, fcolor(gold)) bar(4, fcolor(green)) blabel(bar)*

*univariate binary logistic Analysis*

*logit travelhi i.SEX*

*logit travelhi i.SEX, or*

*logit travelhi i.Agecat1*

*logit travelhi i.Agecat1, or*

*model comparison*

*binreg travelhi i.SEX i.Agecat1, or cformat(%9.4f) pformat(%5.4f) sformat(%8.3f) ml*

*binreg travelhi i.SEX i.Agecat1, hr cformat(%9.4f) pformat(%5.4f) sformat(%8.3f) ml*

*binreg travelhi i.SEX i.Agecat1, rr cformat(%9.4f) pformat(%5.4f) sformat(%8.3f) ml*

*binreg travelhi i.SEX i.Agecat1, rd cformat(%9.4f) pformat(%5.4f) sformat(%8.3f) ml*

*Final model*

*binreg travelhi i.SEX, hr cformat(%9.4f) pformat(%5.4f) sformat(%8.3f) ml*

*binreg travelhi i.Agecat1, hr cformat(%9.4f) pformat(%5.4f) sformat(%8.3f) ml*

*binreg travelhi i.SEX i.Agecat1, hr cformat(%9.4f) pformat(%5.4f) sformat(%8.3f) ml*
